# Supplementary material for: Impacts of Household Coal Combustion on Indoor Ultrafine Particles—A Preliminary Case Study and Implication on Exposure Reduction
Source: MDPI journal article supplement (doi:10.3390/ijerph19095161), 2022-04-24
Supplement: s1 [file s1]

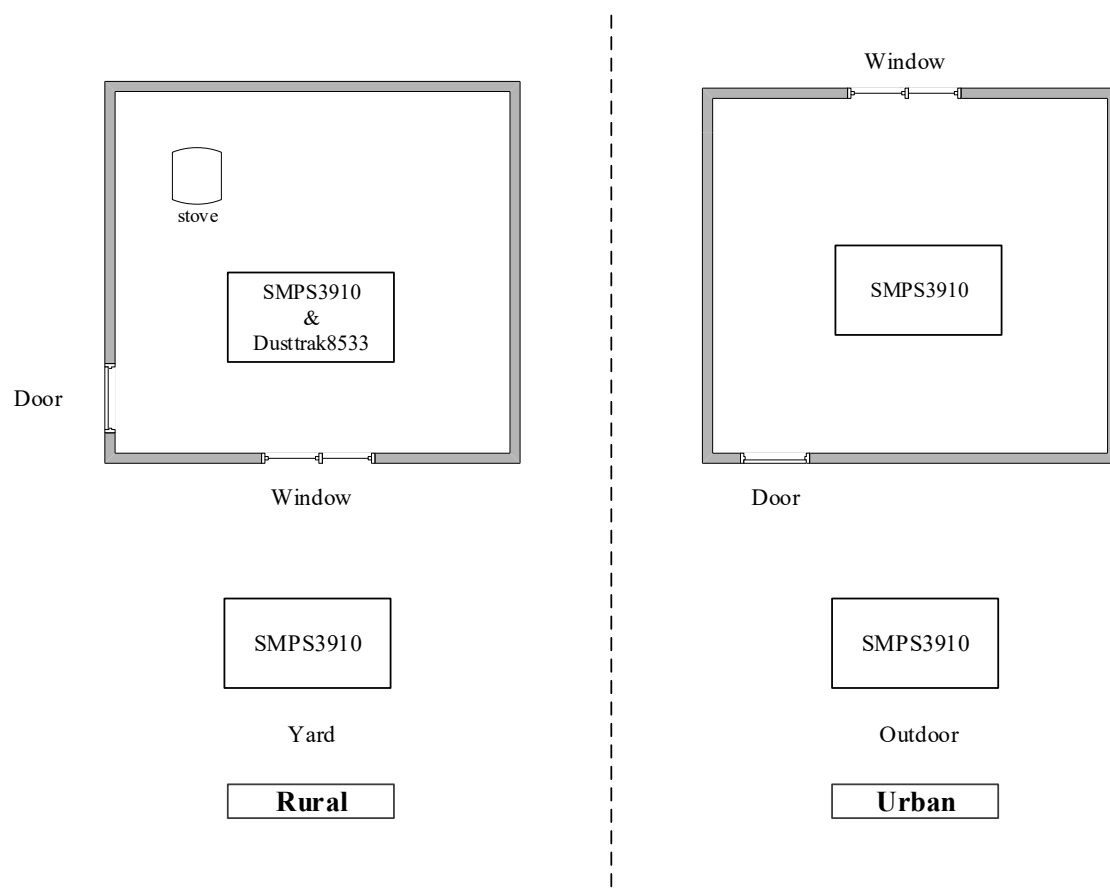

**Figure S1.** The plans of the rural room (**left**) and the urban room (**right**) and the instruments' locations.

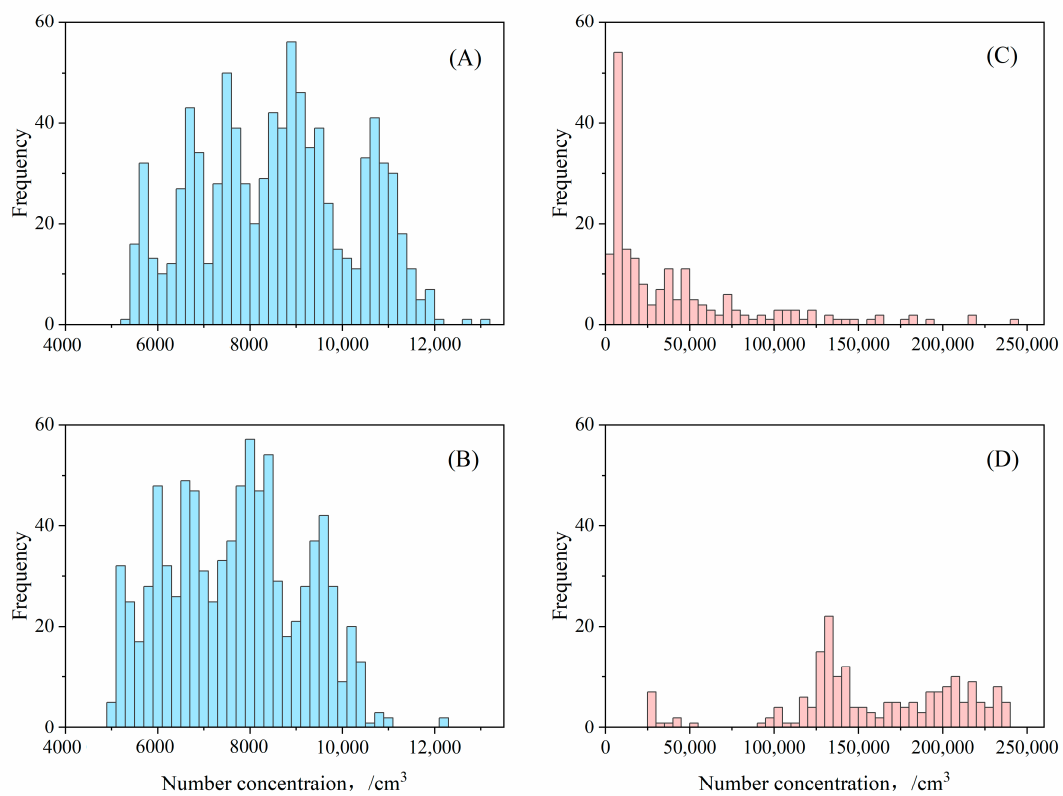

**Figure S2.** Frequency distribution of UFP number concentrations in outdoor (A) and indoor (B) environments without coal combustion indoors, and outdoor (C) and indoor air (D) with coal combustion source present.
